## CORRECTION

# Correction: A systematic review verified by bioinformatic analysis based on TCGA reveals week prognosis power of CAIX in renal cancer

Zikuan Zhang, Bo Wu, Yuan Shao, Yongquan Chen, Dongwen Wang

There are errors in the author affiliations. The correct affiliations are as follows:

Zikuan Zhang<sup>1</sup>, Bo Wu<sup>1,2</sup>, Yuan Shao<sup>1</sup>, Yongquan Chen<sup>1</sup>, Dongwen Wang<sup>1,3</sup>

1. Shanxi Medical University, Taiyuan, Shanxi, China 2. Department of urology, First hospital of Shanxi Medical University, Taiyuan, Shanxi, China 3. National Cancer Center/ National Clinical Research Center for Cancer/Cancer Hospital & Shenzhen Hospital, Chinese Academy of Medical Sciences and Peking Union Medical College, Shenzhen, Guangdong, China

## Reference

1. Zhang Z, Wu B, Shao Y, Chen Y, Wang D (2022) A systematic review verified by bioinformatic analysis based on TCGA reveals week prognosis power of CAIX in renal cancer. PLOS ONE 17(12): e0278556. <https://doi.org/10.1371/journal.pone.0278556> PMID: 36542612

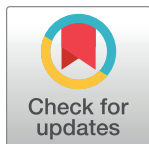

## OPEN ACCESS

**Citation:** Zhang Z, Wu B, Shao Y, Chen Y, Wang D (2024) Correction: A systematic review verified by bioinformatic analysis based on TCGA reveals week prognosis power of CAIX in renal cancer. PLoS ONE 19(12): e0315303. <https://doi.org/10.1371/journal.pone.0315303>

**Published:** December 5, 2024

**Copyright:** © 2024 Zhang et al. This is an open access article distributed under the terms of the [Creative Commons Attribution License](https://creativecommons.org/licenses/by/4.0/), which permits unrestricted use, distribution, and reproduction in any medium, provided the original author and source are credited.
